# Supplementary material for: Toward the discovery of dual inhibitors for botulinum neurotoxin A: concomitant targeting of endocytosis and light chain protease activity
Source: Royal Society of Chemistry journal article supplement (doi:10.1039/c5cc00677e), 2015-01-01
Supplement: c5cc00677e2.pdf [file c5cc00677e2.pdf]

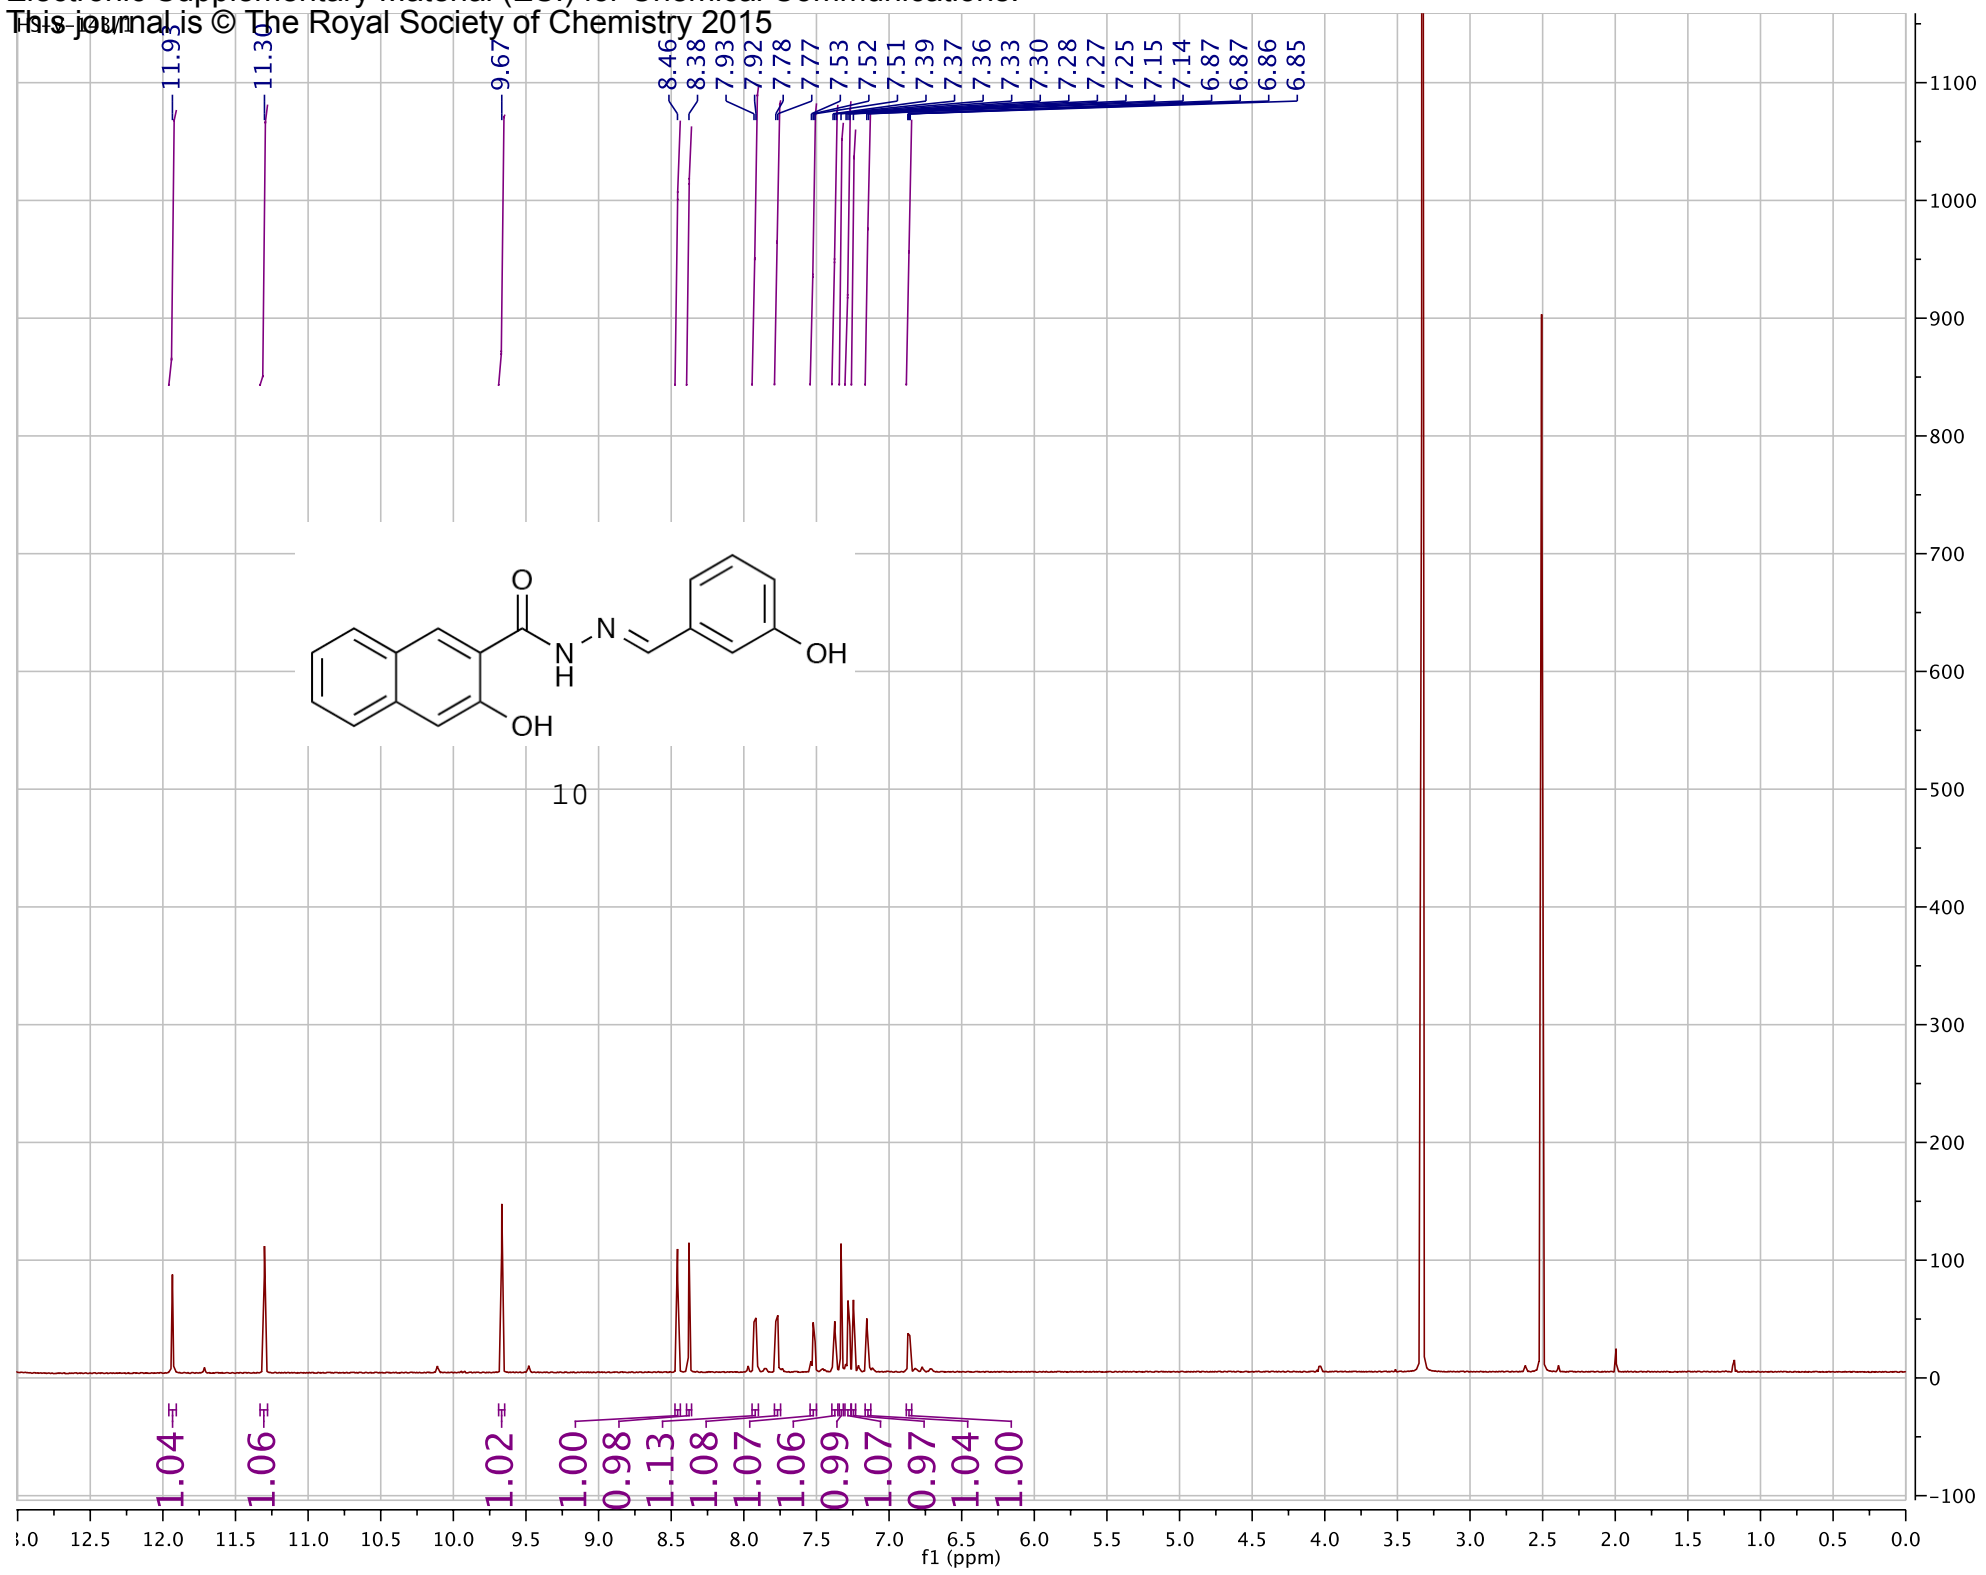

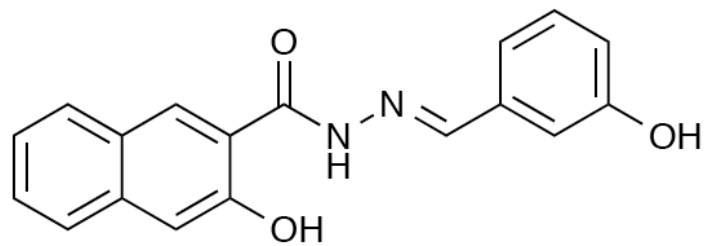

10

- 163.73
- 157.70
- 154.06
- 148.57
- 135.82
- 135.41
- 130.24
- 129.94
- 128.66
- 128.23
- 126.77
- 125.84
- 123.81
- 120.34
- 118.97
- 117.65
- 112.75
- 110.55

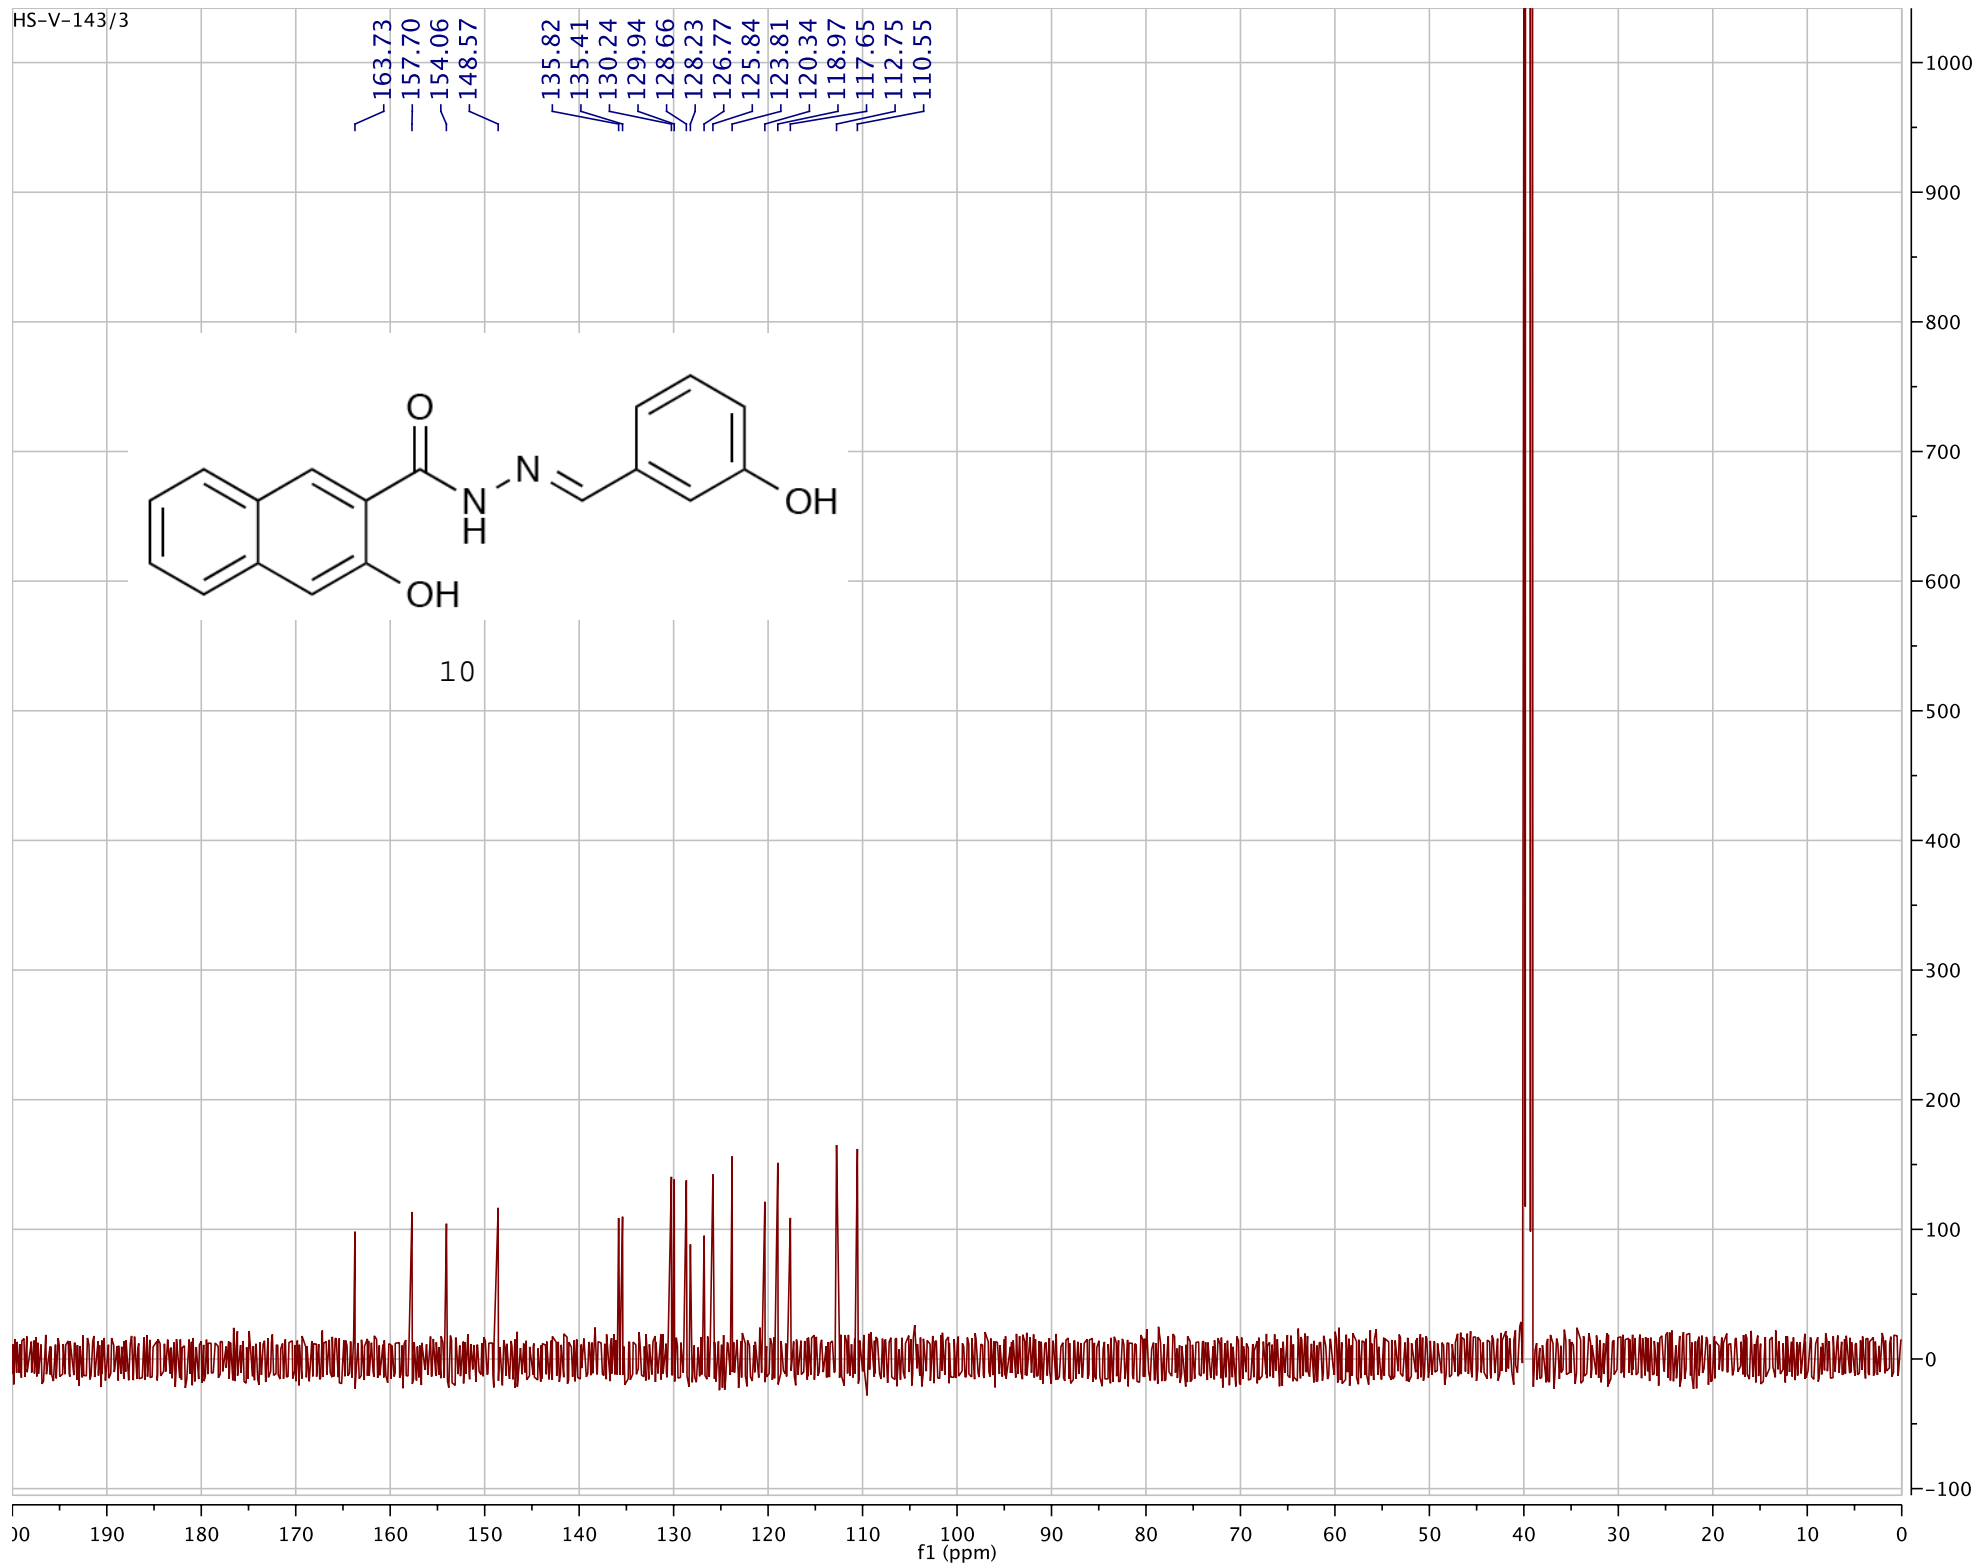

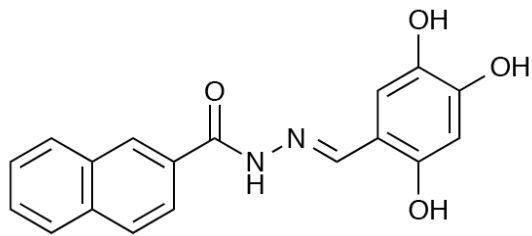

12

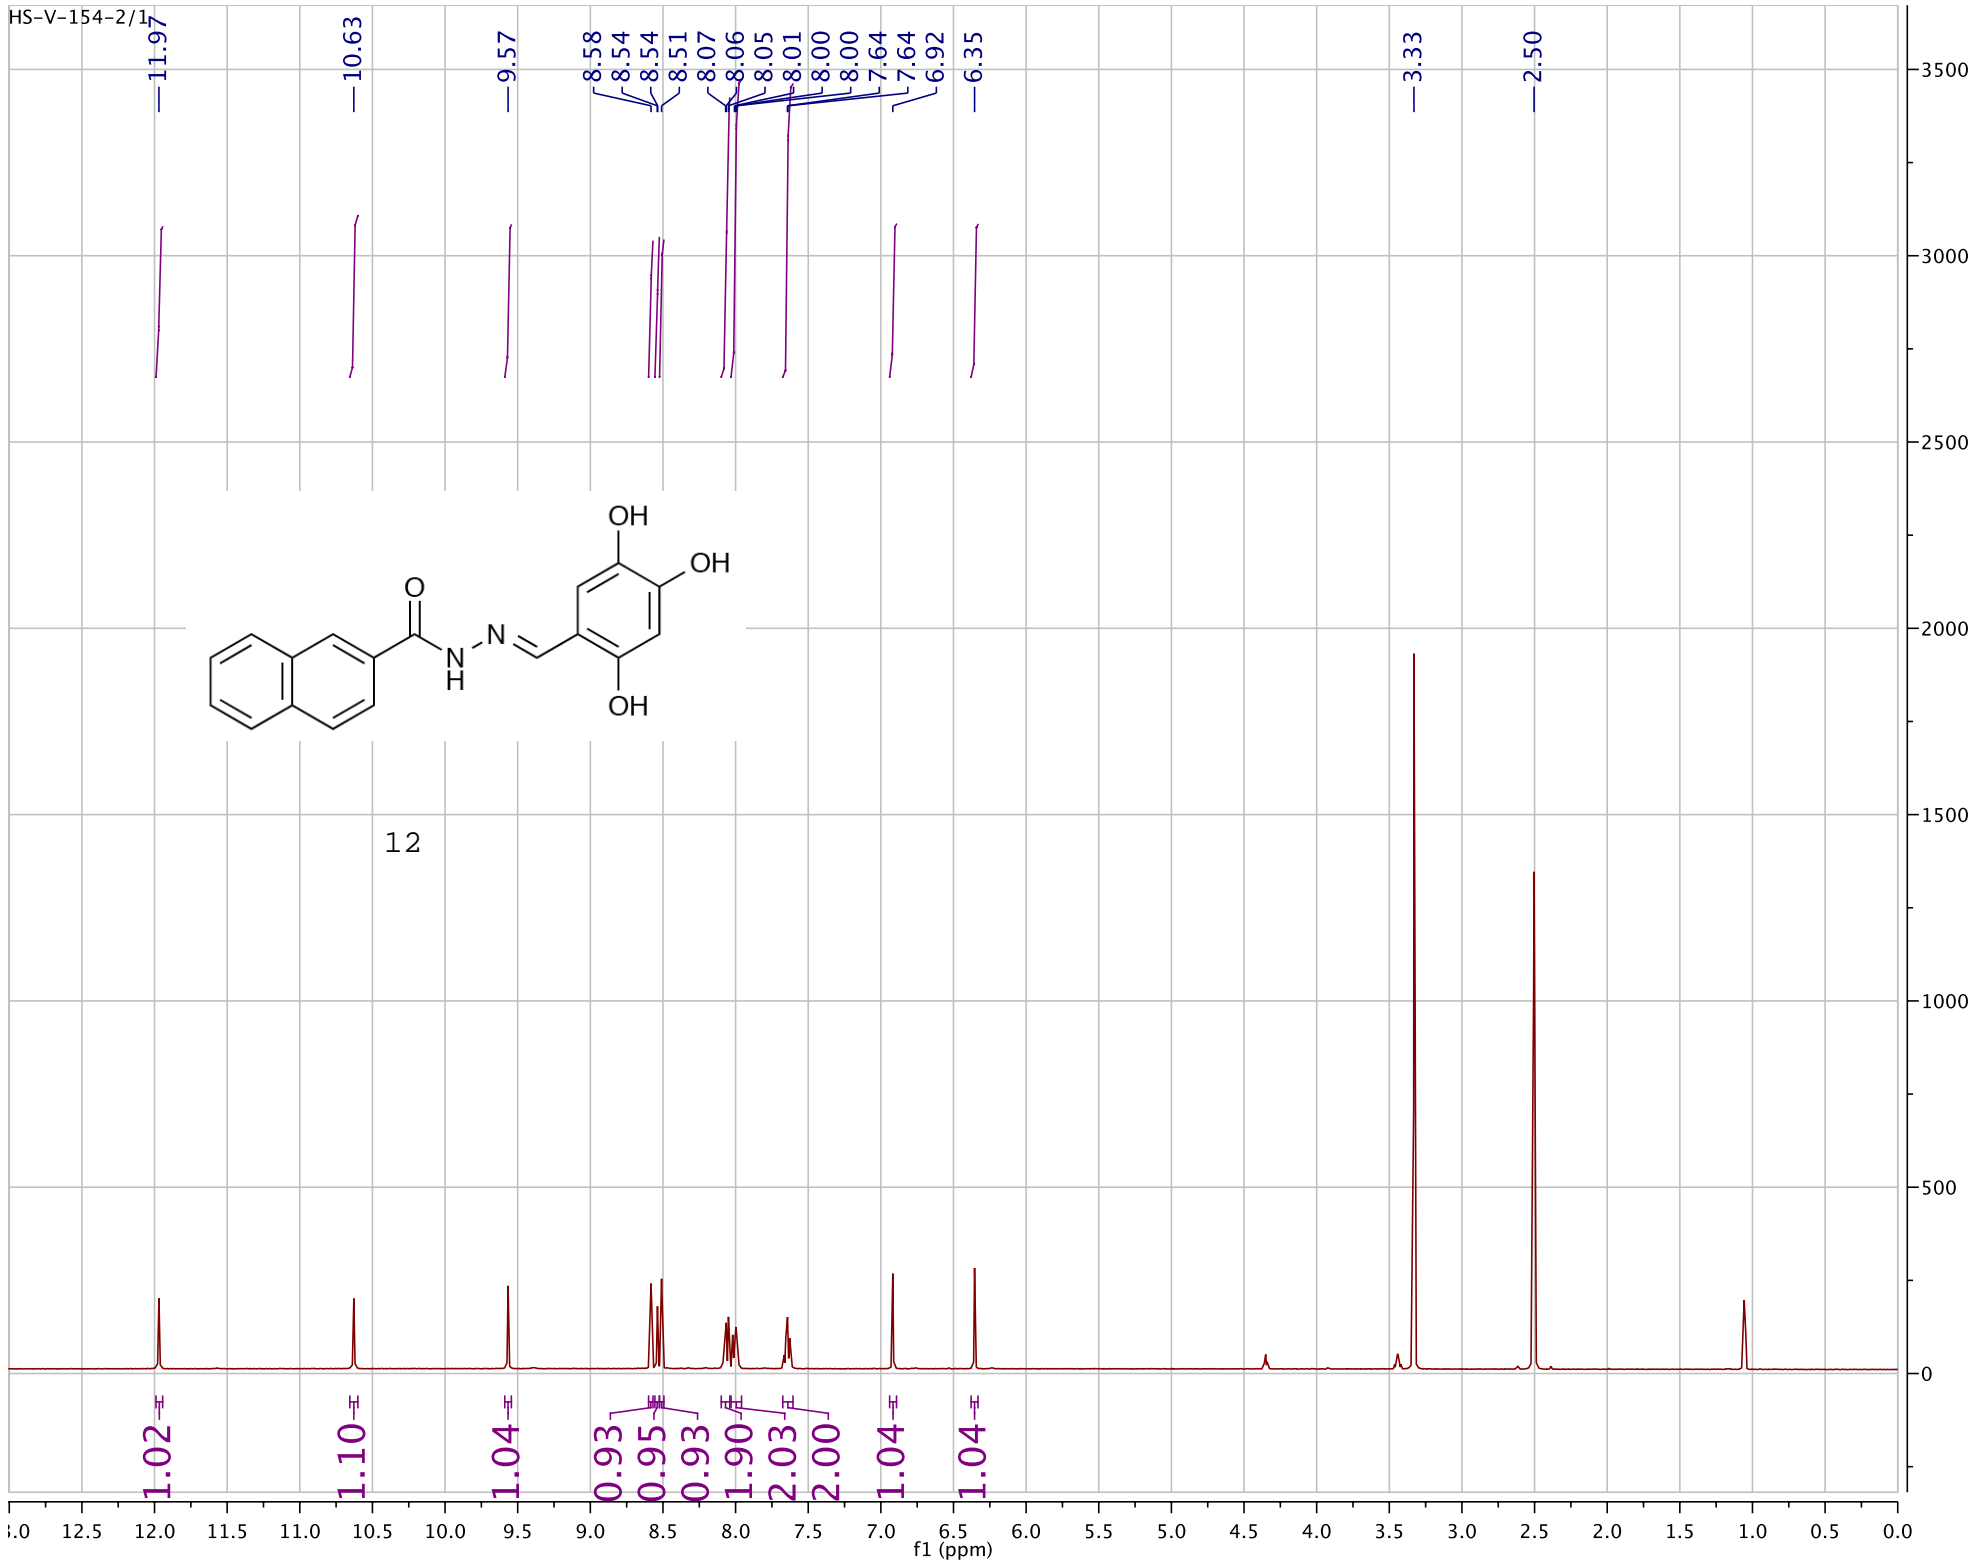

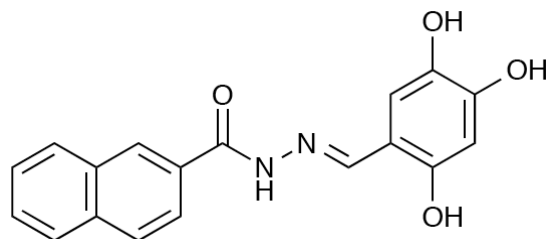

12

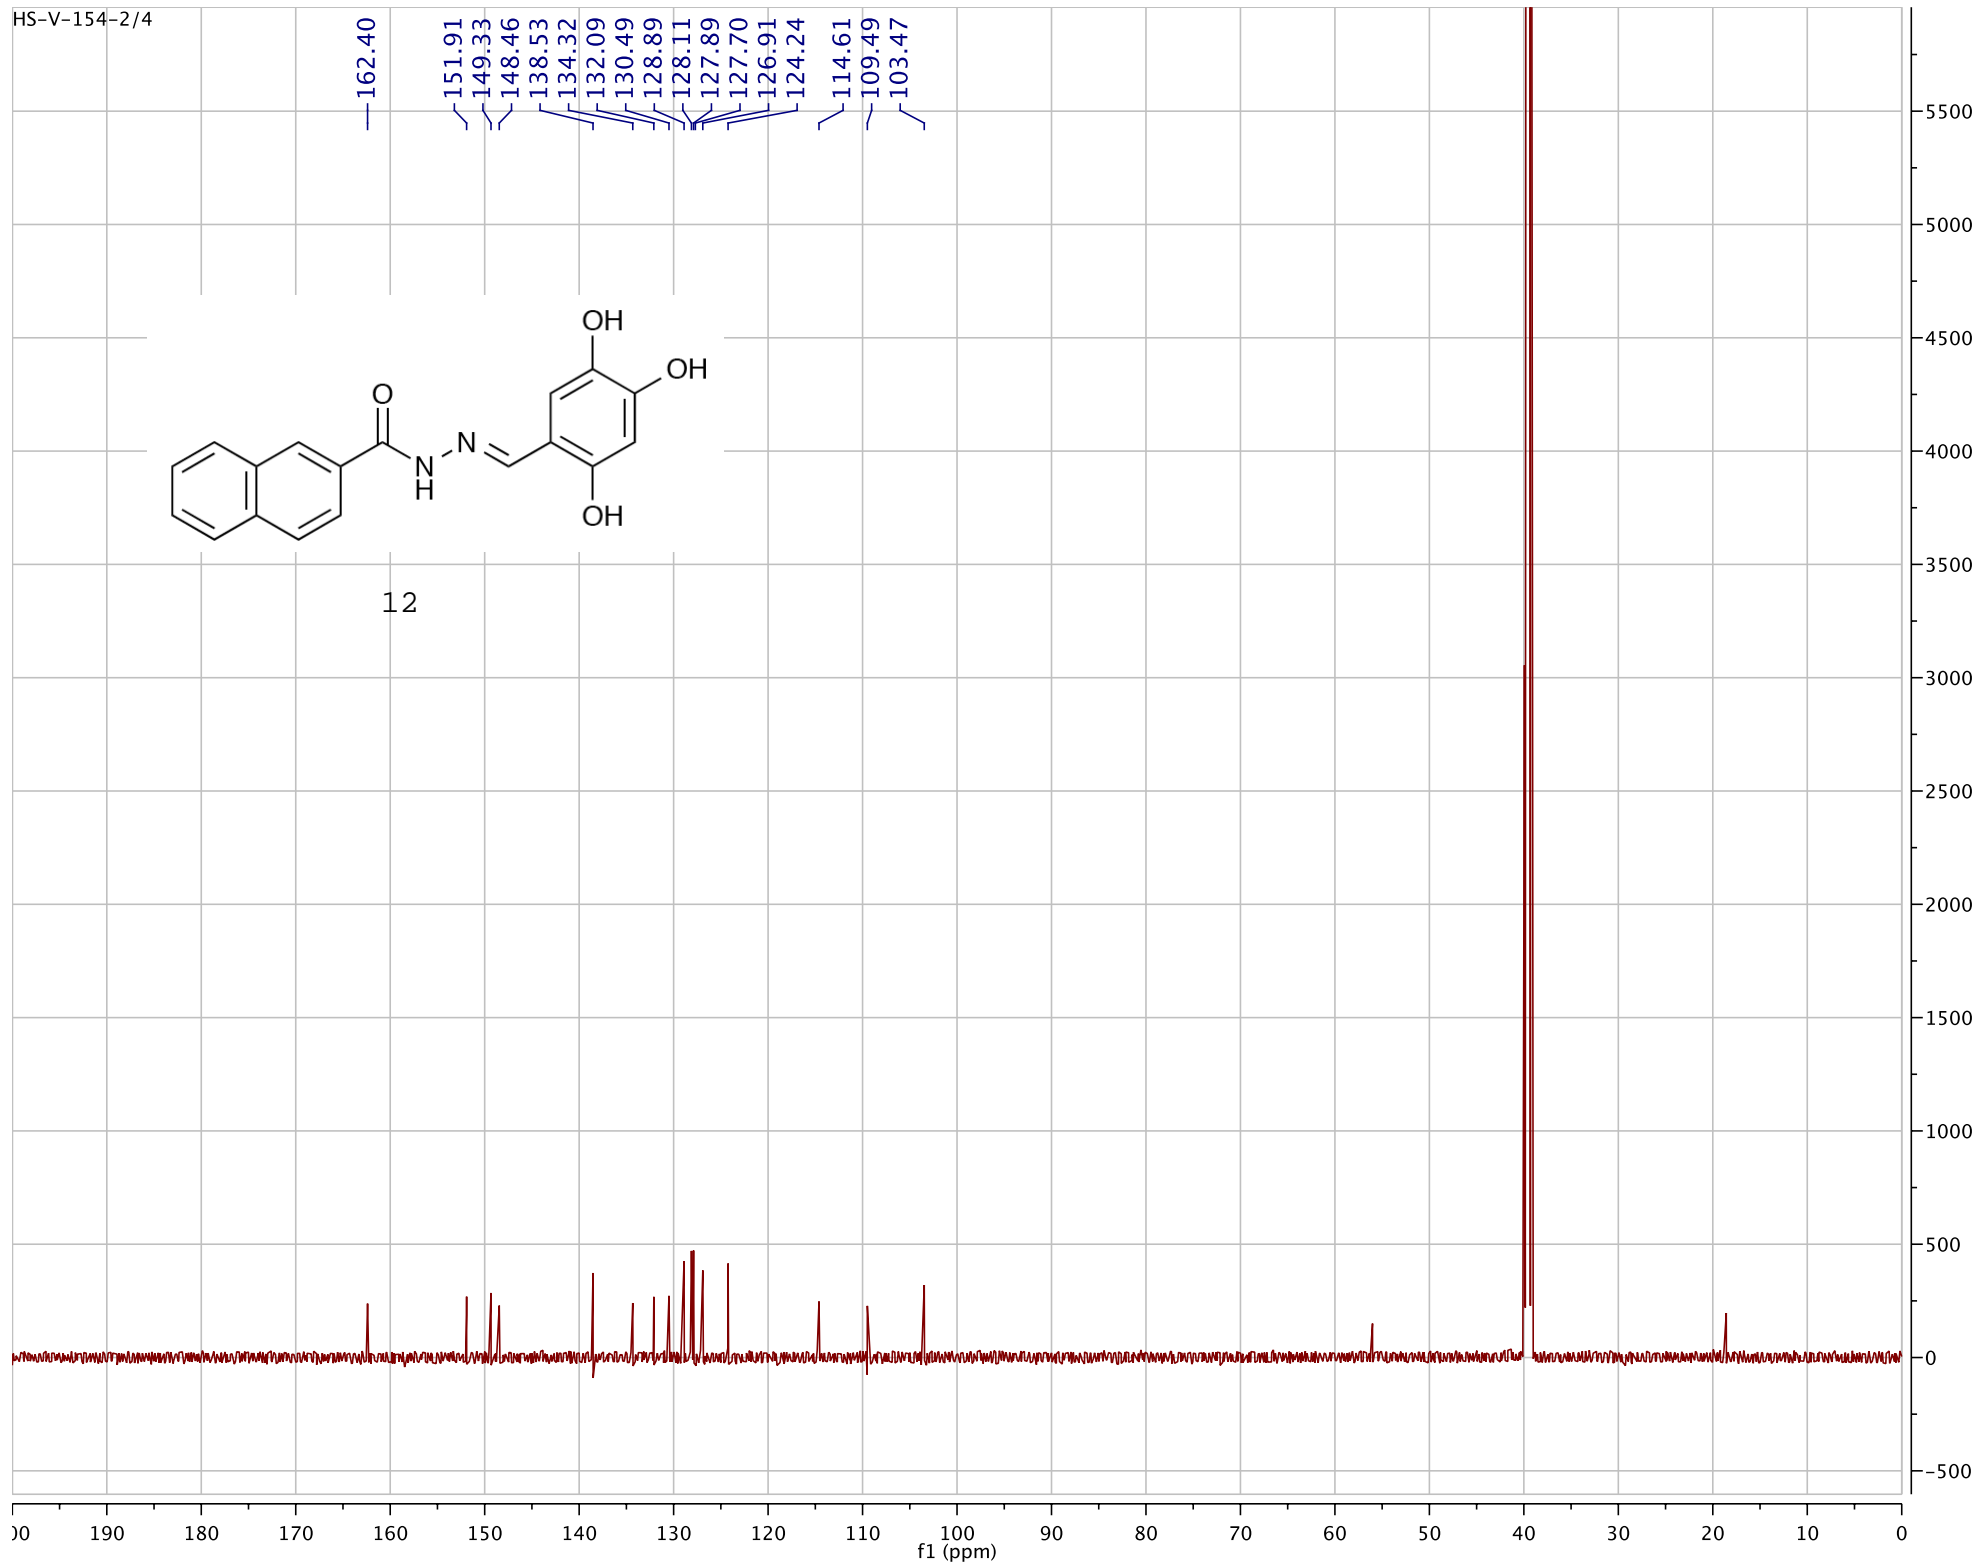

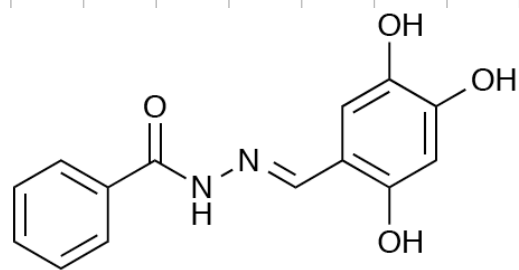

13

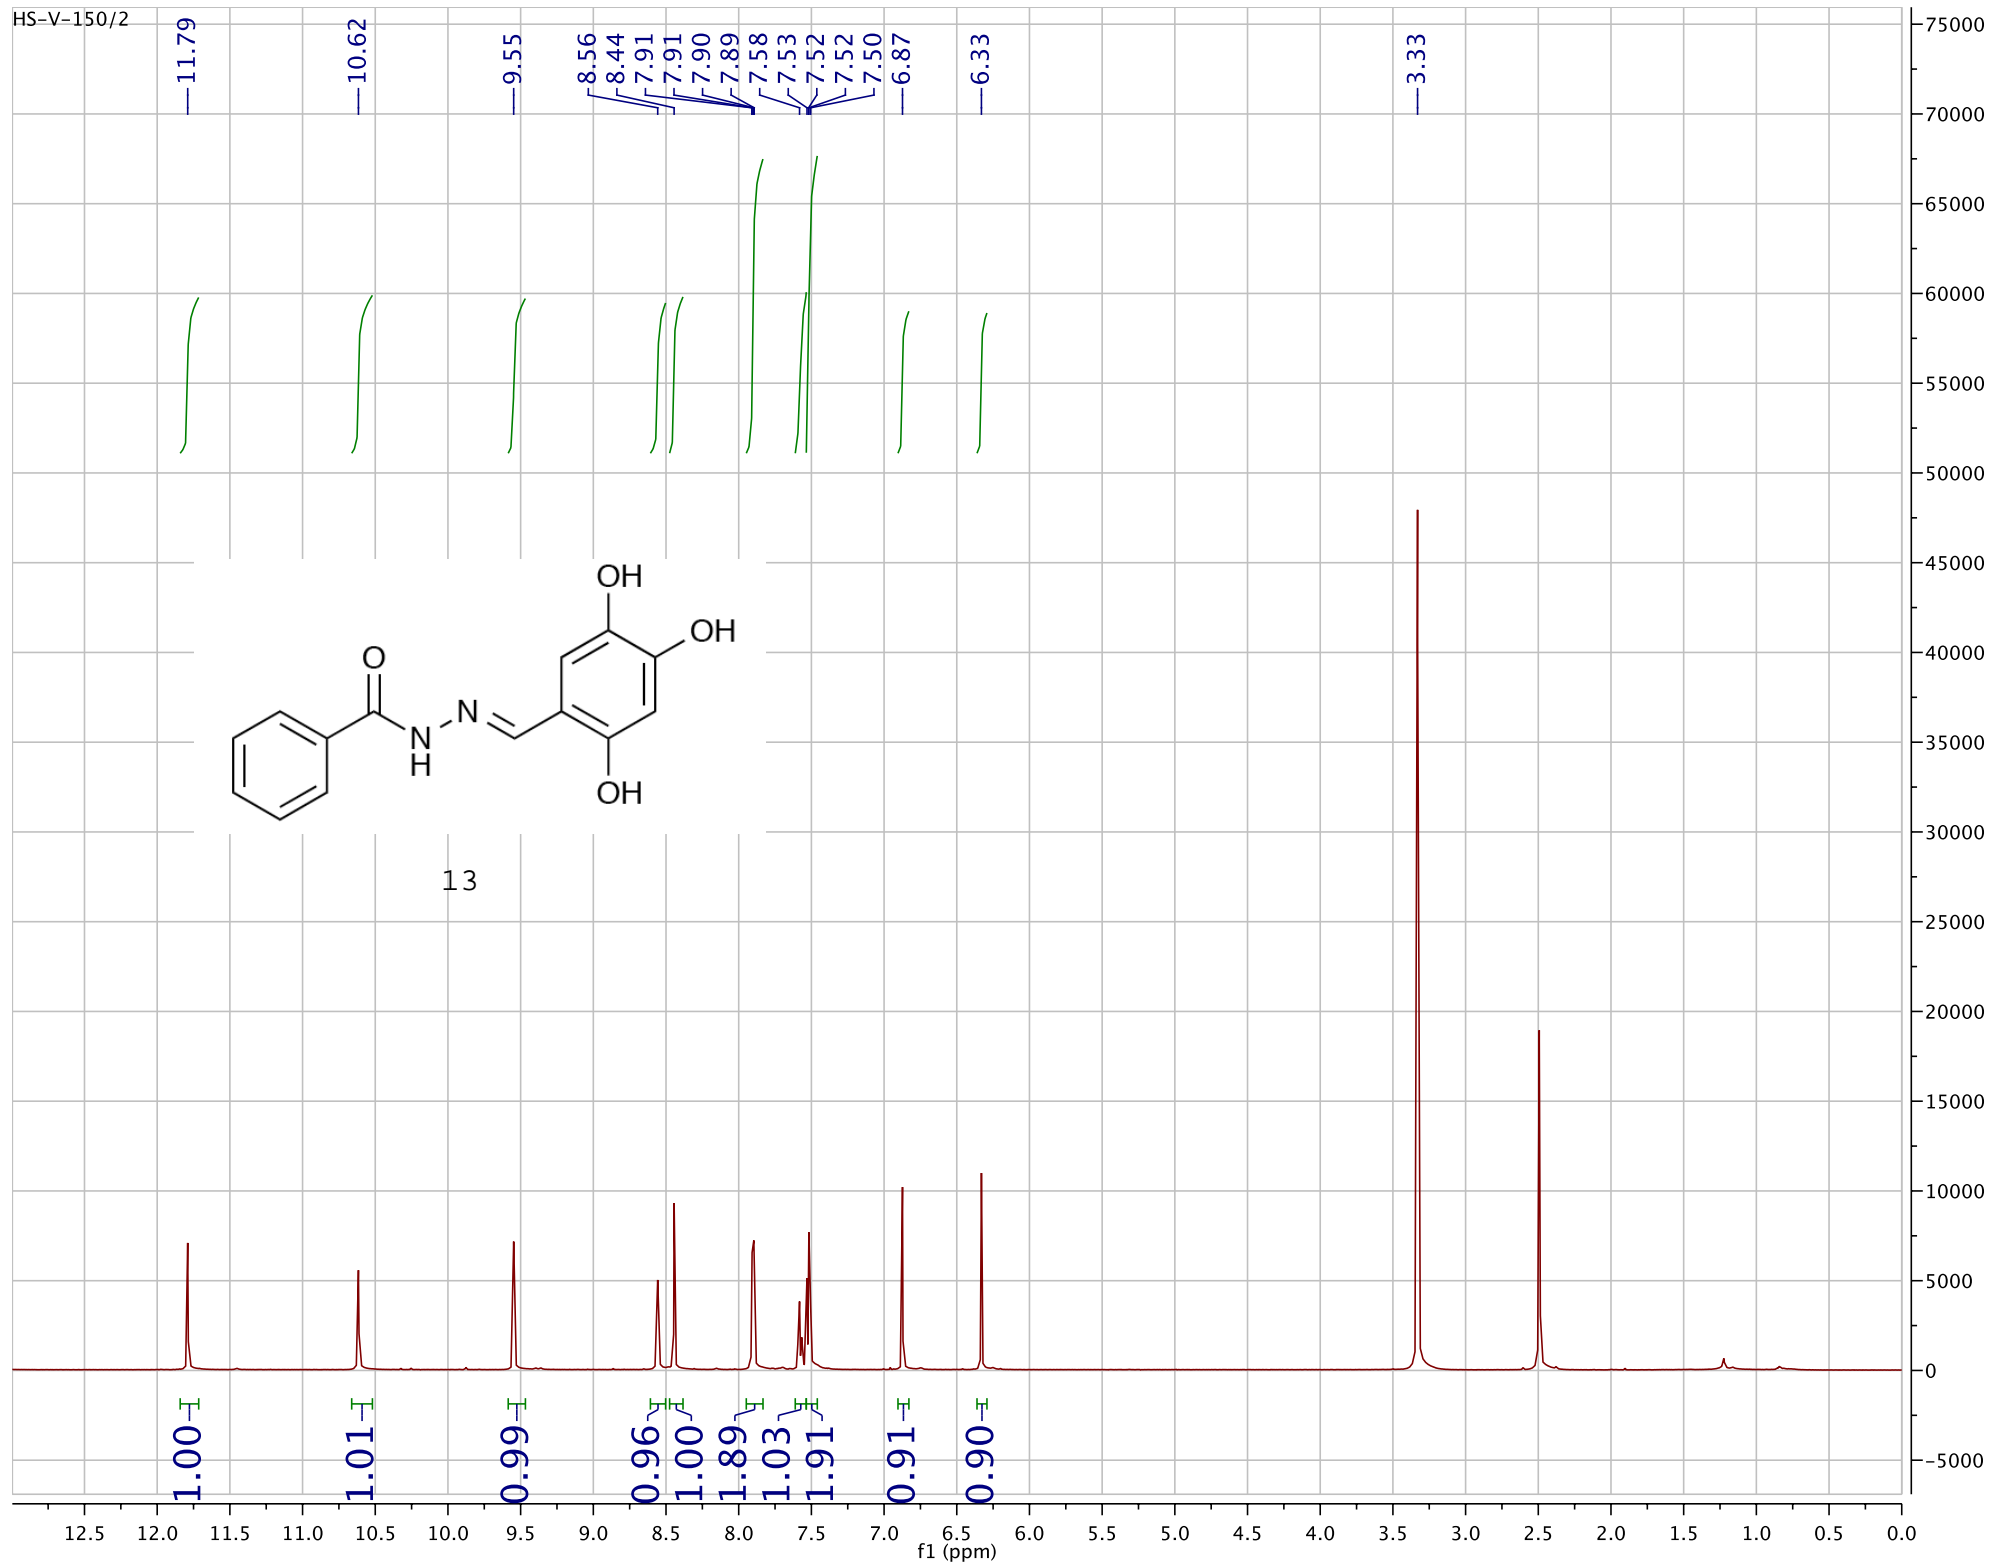

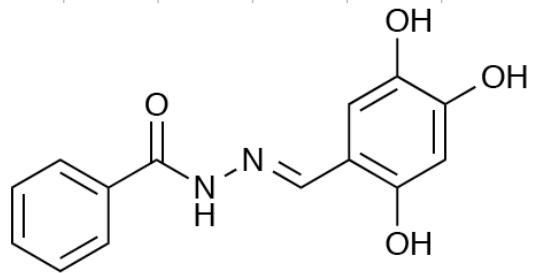

13

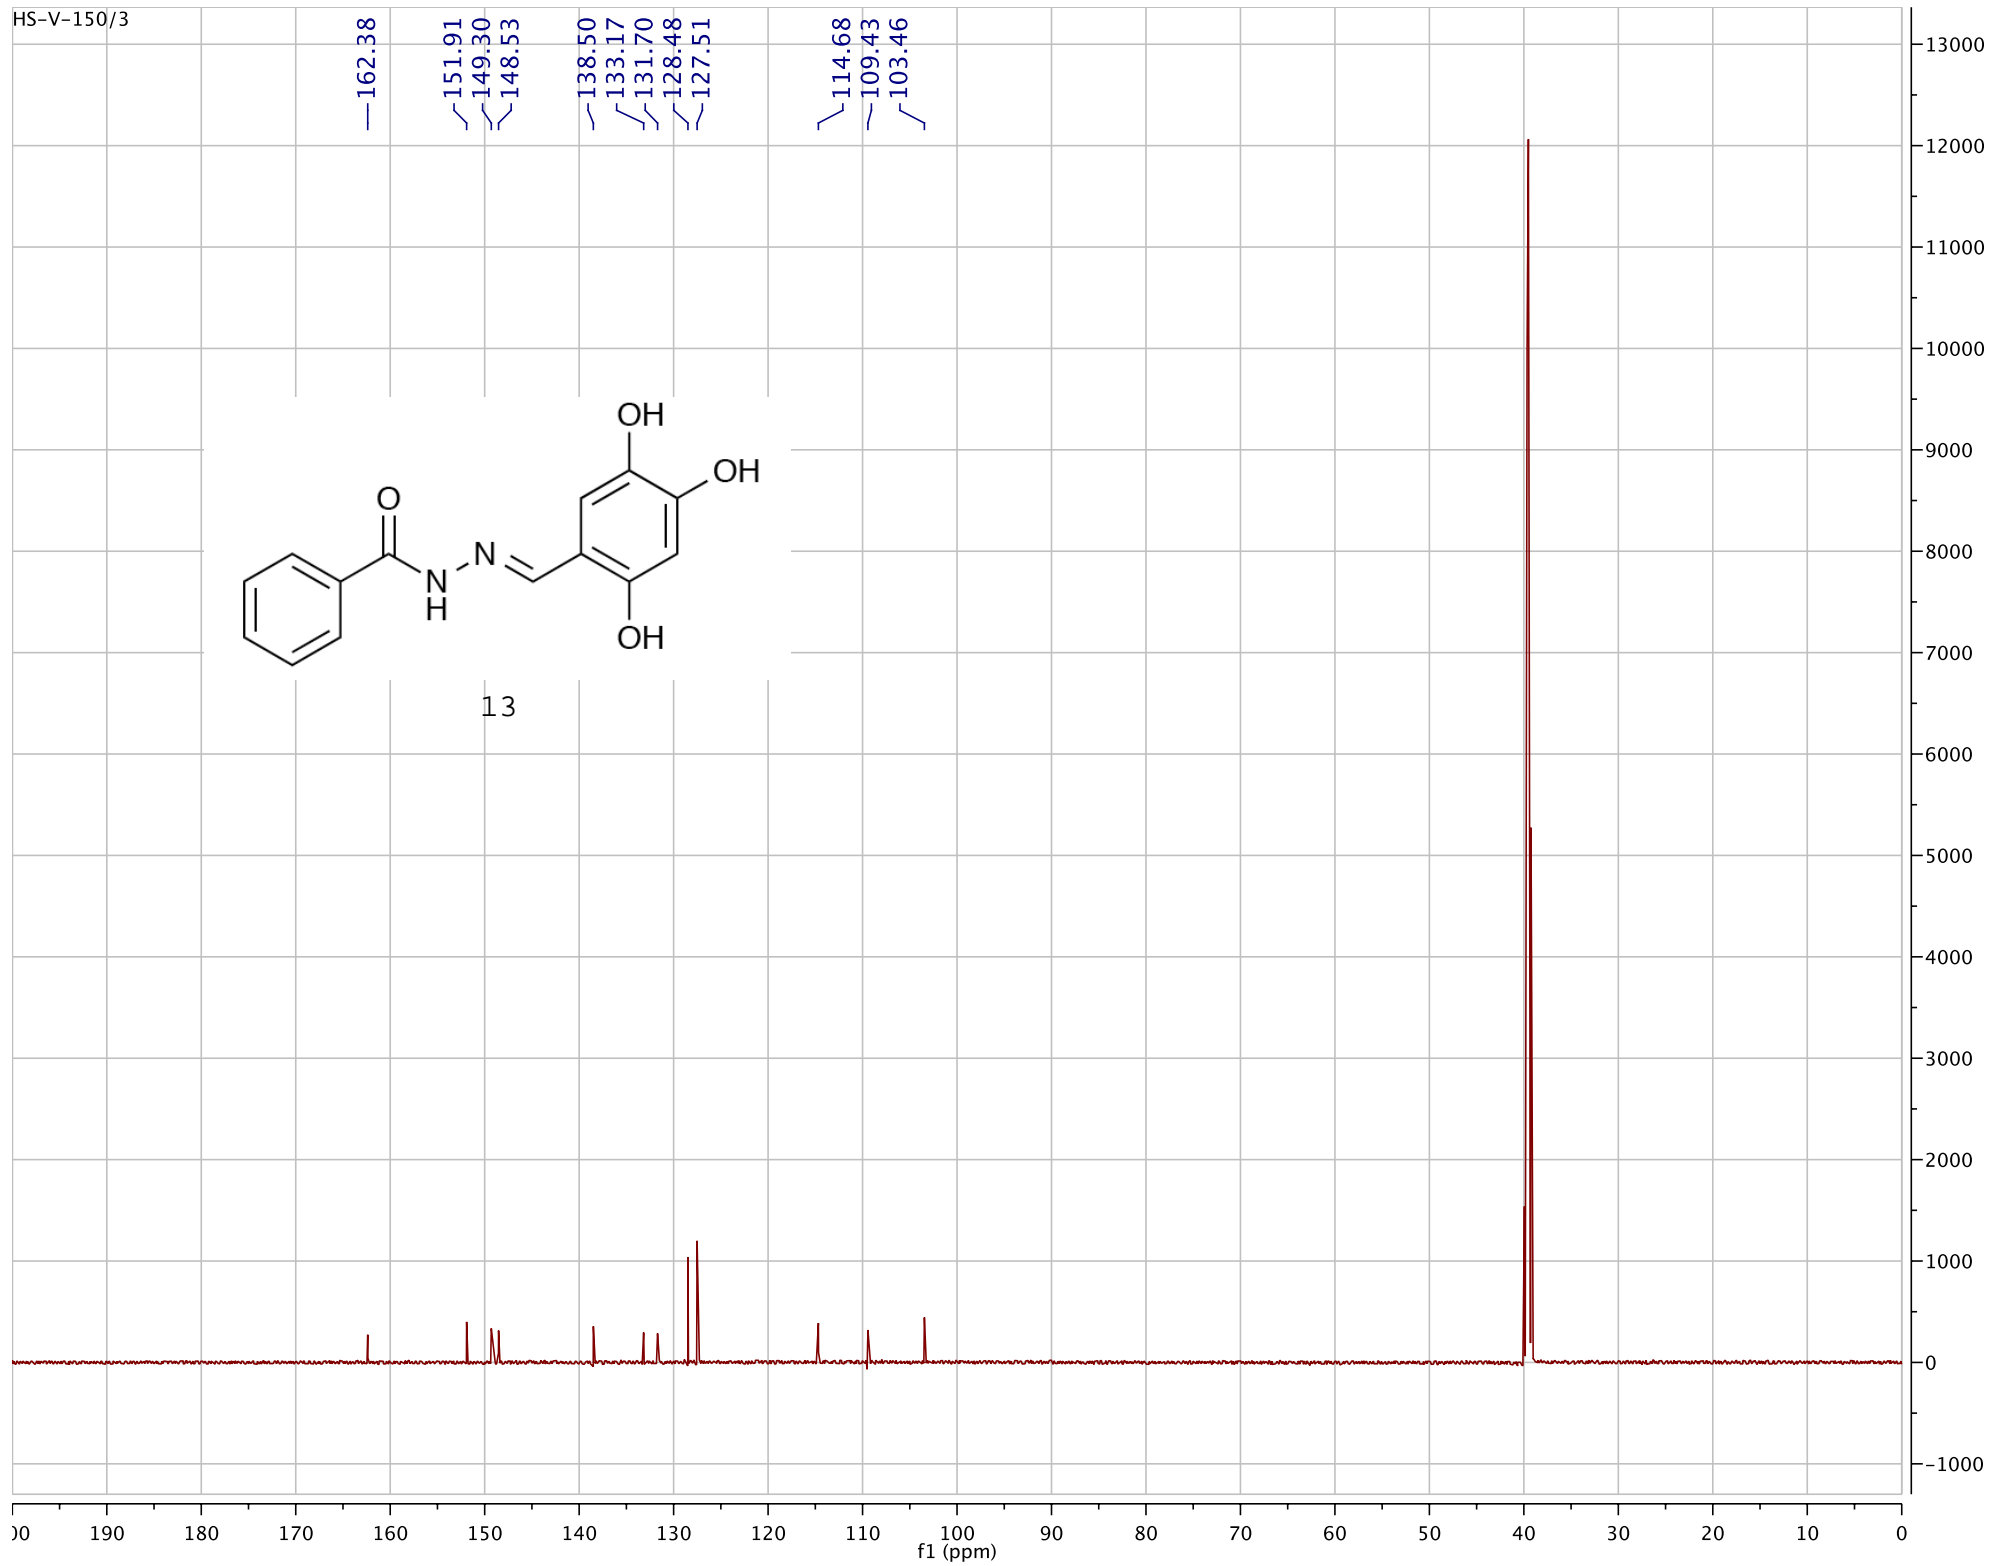

# Normalization Report

Method Name: C:\EZChrom Elite\Enterprise\Projects\Sasha\10-90\_1\_99\_30min\_wr.met  
Data: C:\EZChrom Elite\Enterprise\Projects\Hajime\141022HSV148 stock  
User: hplc11  
Acquired: 10/22/2014 4:00:49 PM  
Printed: 11/15/2014 1:38:22 PM

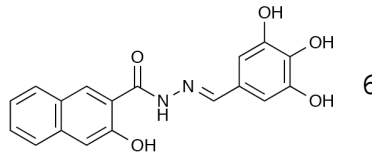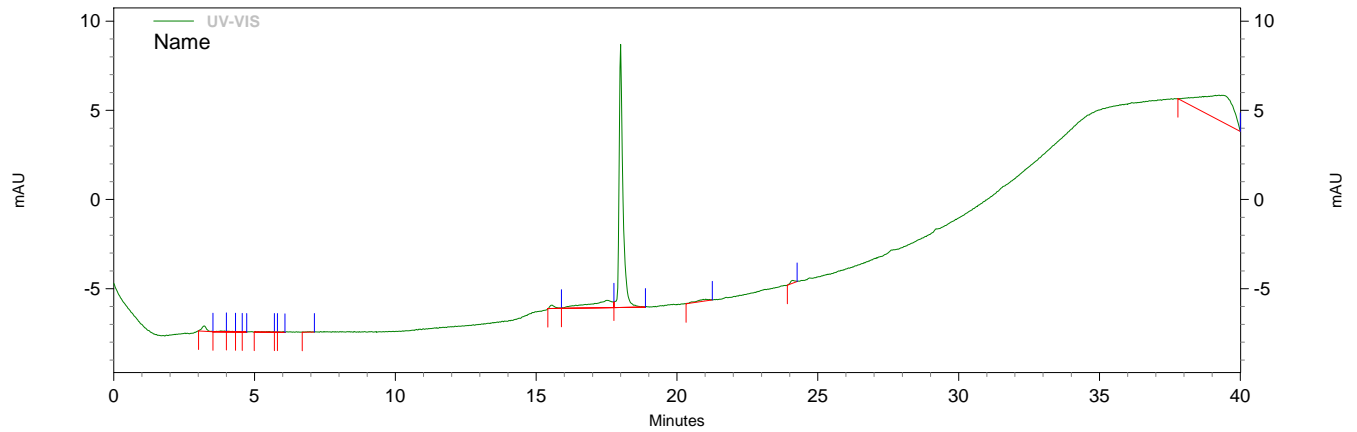

## UV-VIS Results

| PK # | Name | Retention Time | Area | NORM concentration |
|------|------|----------------|------|--------------------|
|------|------|----------------|------|--------------------|

# Normalization Report

Method Name: C:\EZChrom Elite\Enterprise\Projects\Sasha\10-90\_1\_99\_30min\_wr.met  
Data: C:\EZChrom Elite\Enterprise\Projects\Hajime\141022HSV141 stock2  
User: hplc11  
Acquired: 10/22/2014 2:38:32 PM  
Printed: 11/15/2014 1:41:04 PM

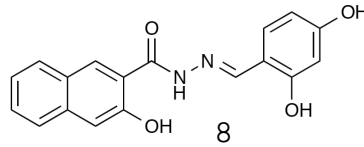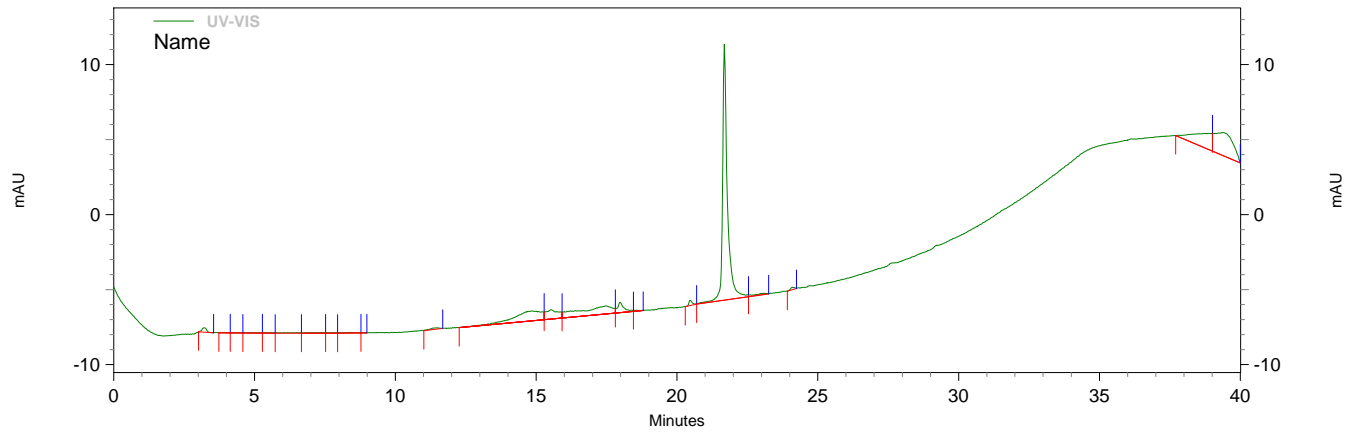

## UV-VIS Results

| PK # | Name | Retention Time | Area | NORM concentration |
|------|------|----------------|------|--------------------|
|------|------|----------------|------|--------------------|



# Normalization Report

Method Name: C:\EZChrom Elite\Enterprise\Projects\Sasha\10-90\_1\_99\_30min\_wr.met  
Data: C:\EZChrom Elite\Enterprise\Projects\Hajime\141022HSV143 stock  
User: hplc11  
Acquired: 10/22/2014 1:16:13 PM  
Printed: 11/15/2014 1:39:50 PM

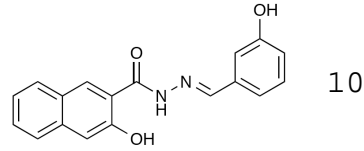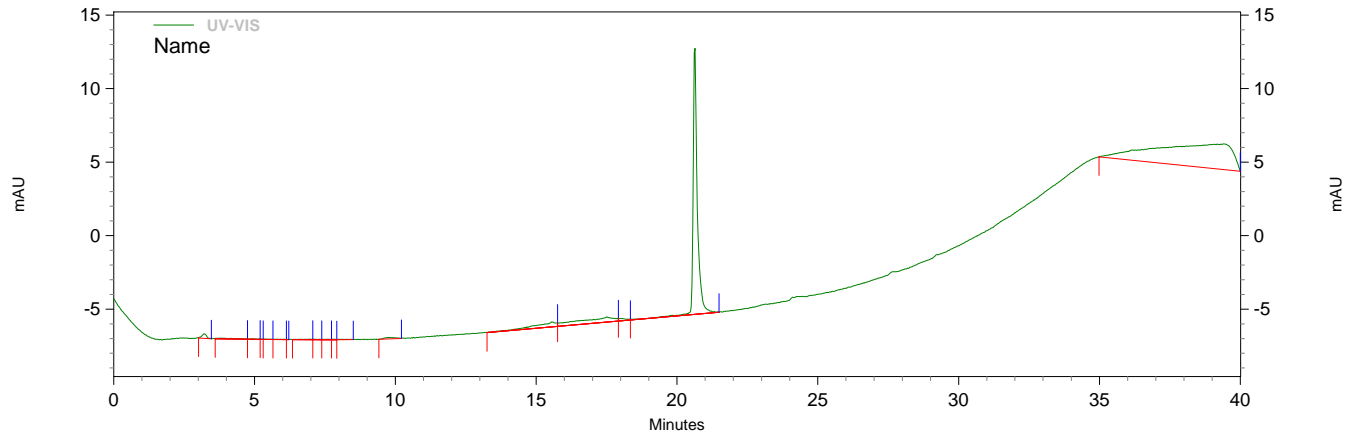

## UV-VIS Results

| PK # | Name | Retention Time | Area | NORM concentration |
|------|------|----------------|------|--------------------|
|------|------|----------------|------|--------------------|

# Normalization Report

Method Name: C:\EZChrom Elite\Enterprise\Projects\Sasha\10-90\_1\_99\_30min\_wr.met  
Data: C:\EZChrom Elite\Enterprise\Projects\Hajime\140717RM111  
User: hplc11  
Acquired: 7/16/2014 3:01:06 PM  
Printed: 11/15/2014 1:44:27 PM

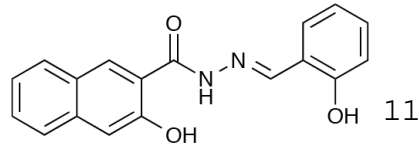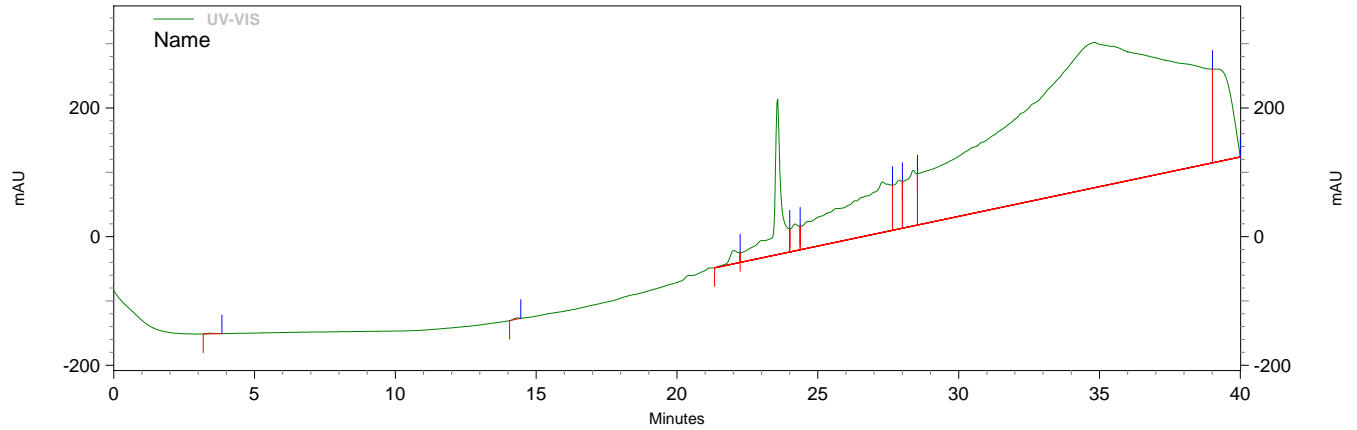

## UV-VIS Results

| PK # | Name | Retention Time | Area | NORM concentration |
|------|------|----------------|------|--------------------|
|------|------|----------------|------|--------------------|

# Normalization Report

Method Name: C:\EZChrom Elite\Enterprise\Projects\Hajime\Hajime10-90, 0.5h.met  
Data: C:\EZChrom Elite\Enterprise\Projects\Hajime\141016HSV154-2  
User: hplc11  
Acquired: 10/16/2014 11:42:02 AM  
Printed: 10/16/2014 2:49:37 PM

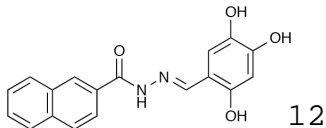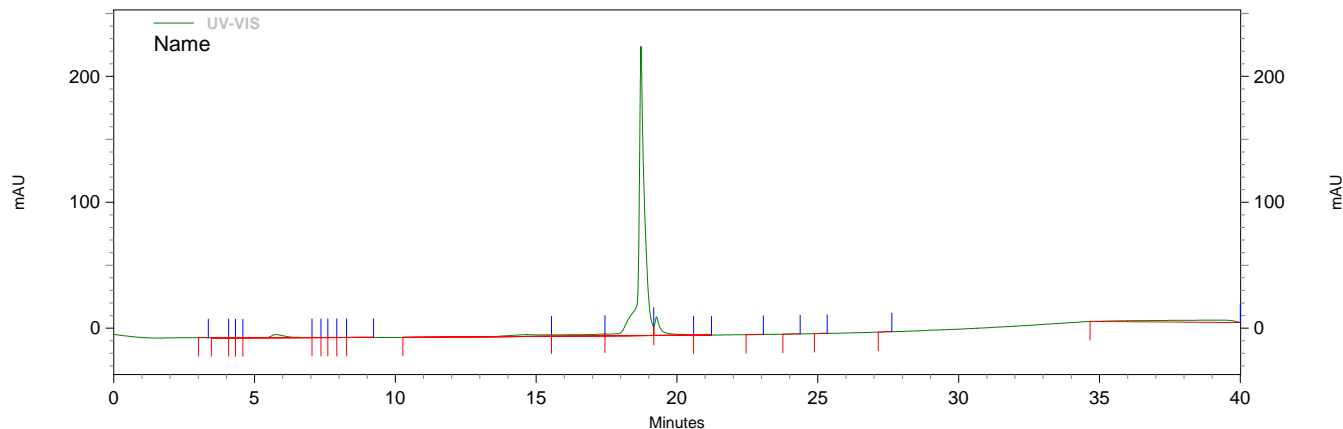

## UV-VIS Results

| PK # | Name | Retention Time | Area | NORM concentration |
|------|------|----------------|------|--------------------|
|------|------|----------------|------|--------------------|

# Normalization Report

Method Name: C:\EZChrom Elite\Enterprise\Projects\Hajime\Hajime10-90, 0.5h.met  
Data: C:\EZChrom Elite\Enterprise\Projects\Hajime\140914HSV150  
User: hplc11  
Acquired: 9/15/2014 12:04:32 PM  
Printed: 10/15/2014 3:54:01 PM

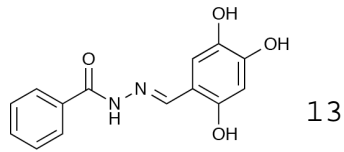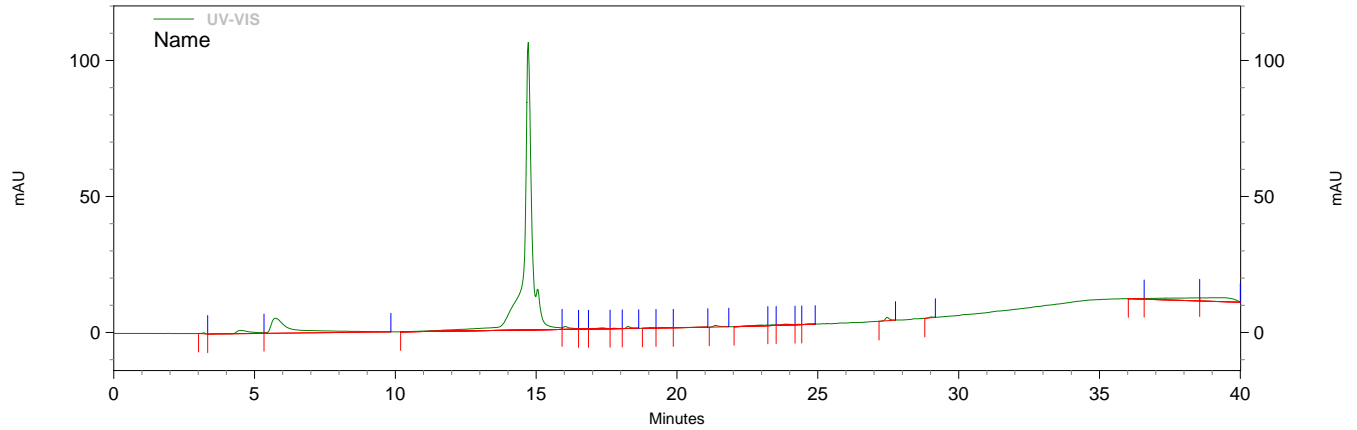

## UV-VIS Results

| PK # | Name | Retention Time | Area | NORM concentration |
|------|------|----------------|------|--------------------|
|------|------|----------------|------|--------------------|
